# Supplementary material for: A droplet energy harvesting and actuation system for self-powered digital microfluidics
Source: Royal Society of Chemistry journal article supplement (doi:10.1039/c7lc01259d), 2018-01-01
Supplement: c7lc01259d5.pdf [file c7lc01259d5.pdf]

## Supporting Information

### A droplet energy harvesting and actuation system for self-powered digital microfluidics

Guijun Chen, Xiaohua Liu, Sufen Li, Ming Dong and Dongyue Jiang\*

\*Email: [jiangdy@dlut.edu.cn](mailto:jiangdy@dlut.edu.cn)

School of Energy and Power Engineering

Dalian University of Technology

No.2 Linggong Road, Dalian city

China 116024

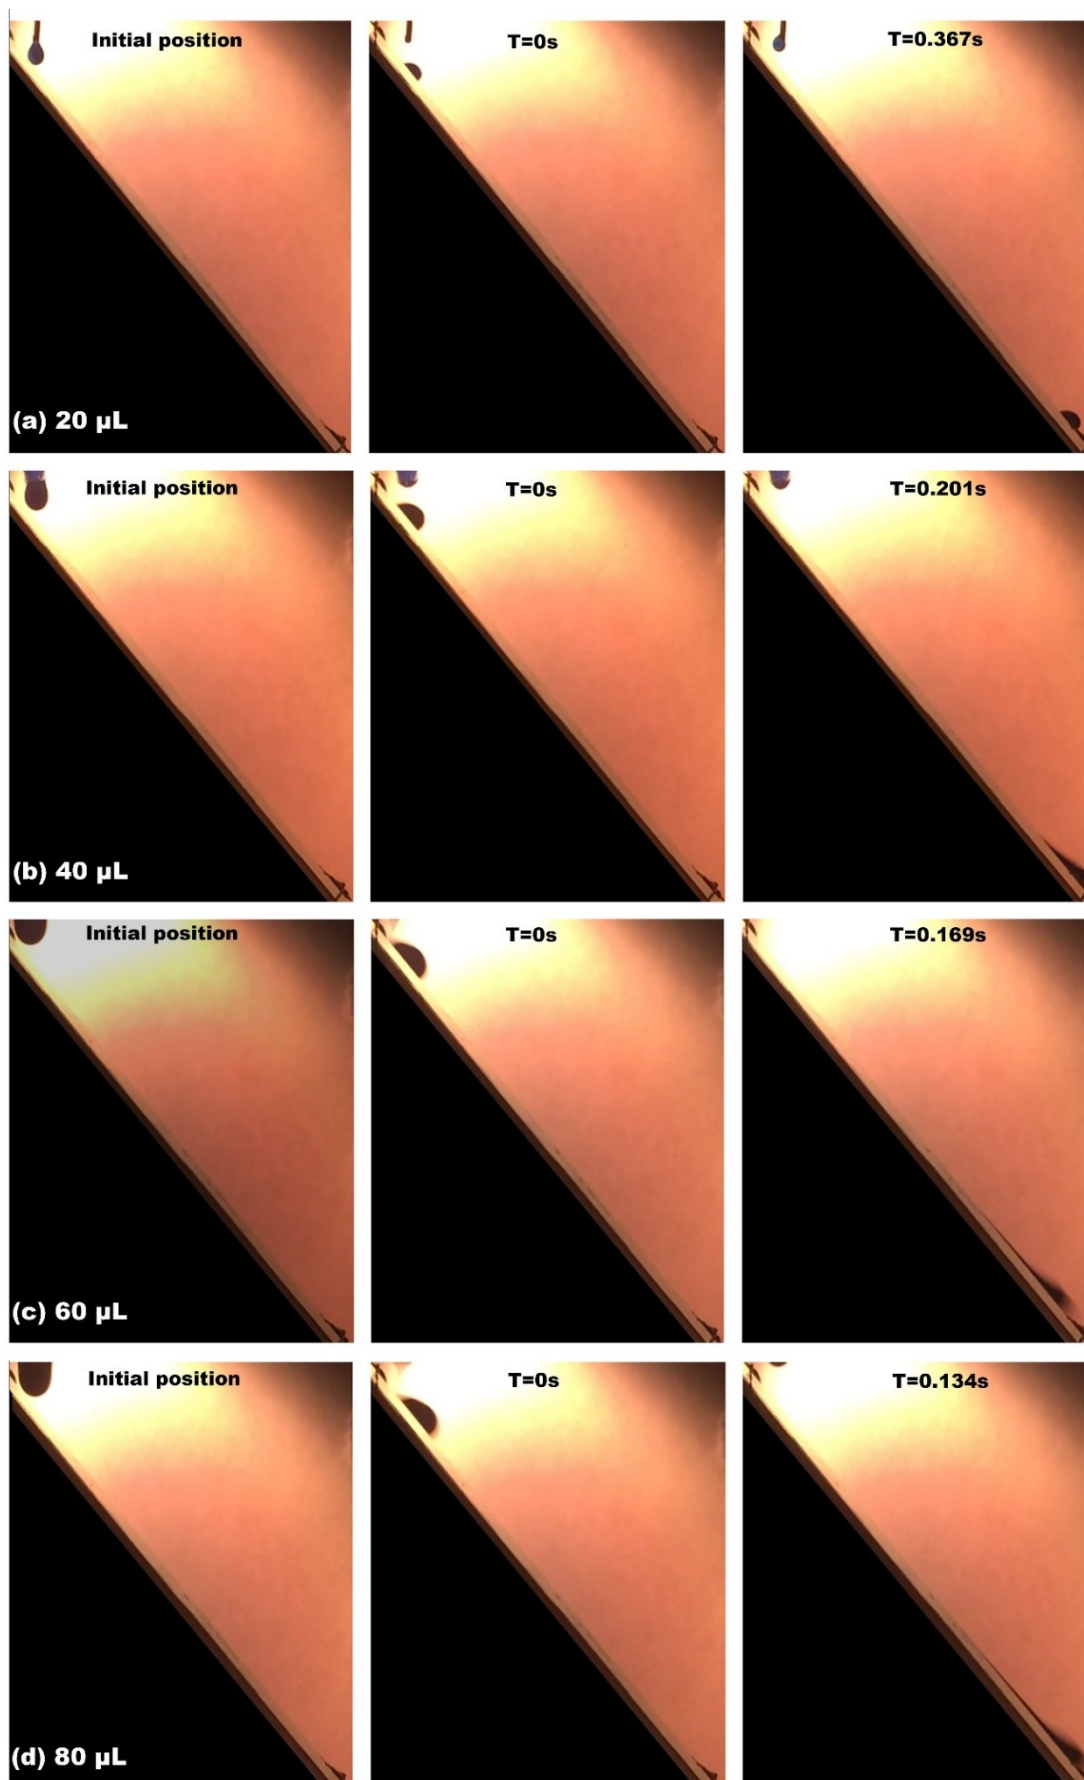

Figure S1. 20  $\mu\text{L}$  (a), 40  $\mu\text{L}$  (b), 60  $\mu\text{L}$  (c) and 80  $\mu\text{L}$  (d) droplet sliding motion

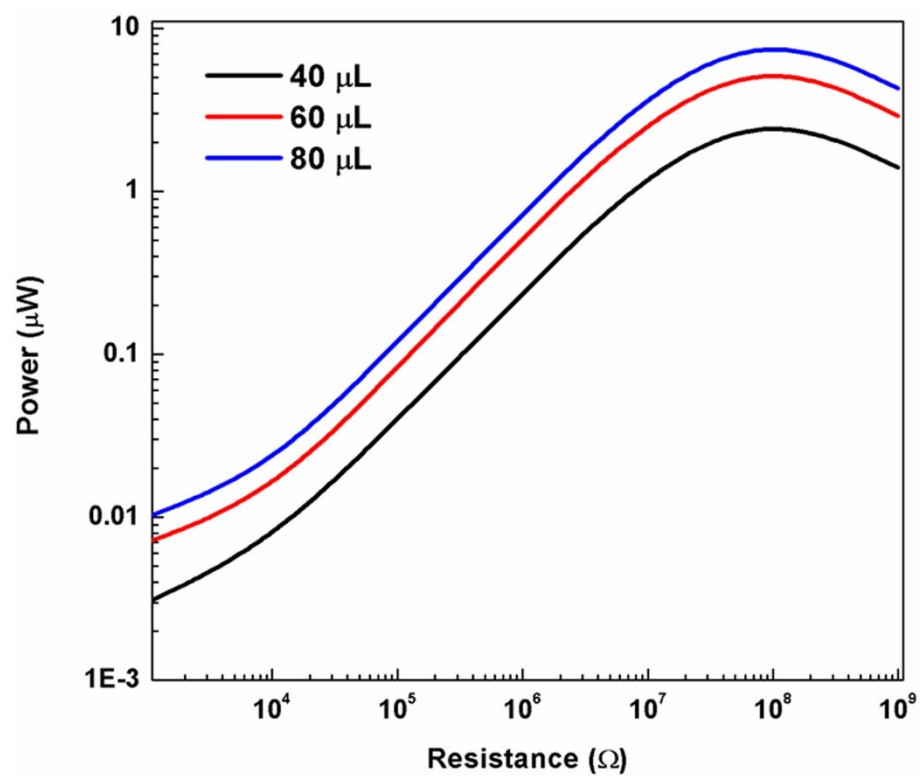

Figure S2. Output power of the 40  $\mu\text{L}$ , 60  $\mu\text{L}$  and 80  $\mu\text{L}$  droplet sliding motion varying with different load resistances.

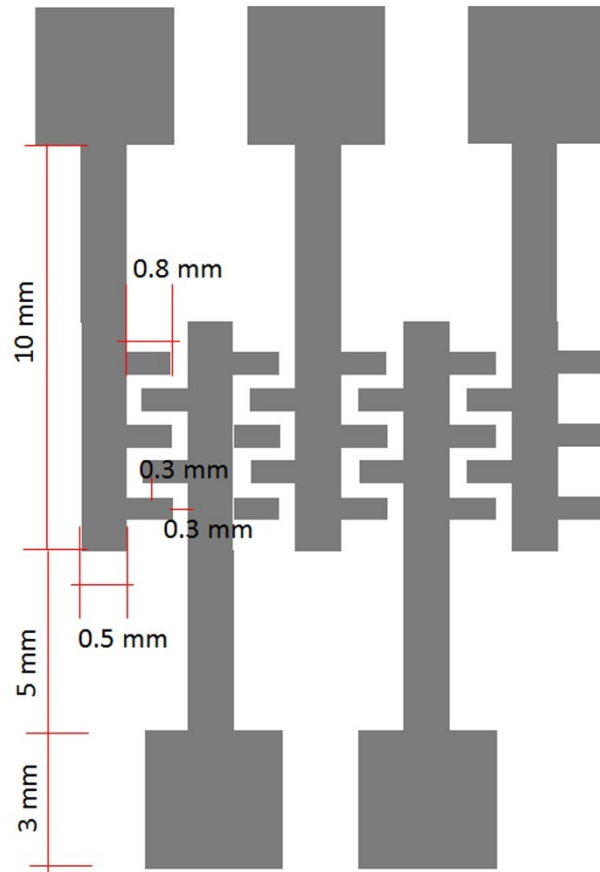

Figure S3. Comb-shaped electrode design

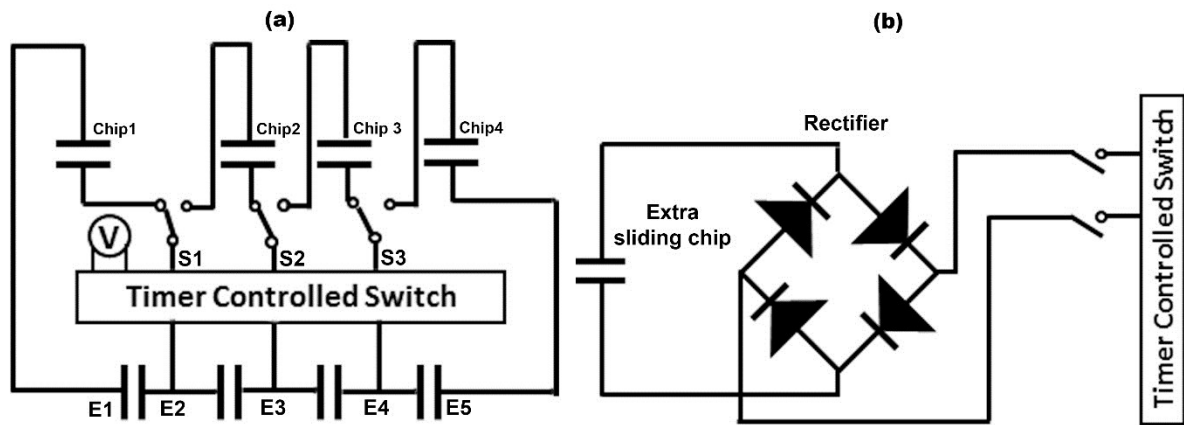

Figure S4. (a) timer controlled switch circuit connecting the sliding chips and actuation chip and (b) an extra sliding chip with a rectifier to supply power for the timer controlled switch.
